# Supplementary material for: Peer-based Retention Of people who Use Drugs in Rural Research (PROUD-R2): a multisite, randomised, 12-month trial to compare efficacy of standard versus peer-based approaches to retain rural people who use drugs in research
Source: HighWire-hosted journal article supplement (doi:10.1136/bmjopen-2022-064400), 2022-06-01
Supplement: bmjopen-2022-064400supp001_data_supplement.pdf [file bmjopen-2022-064400supp001_data_supplement.pdf]

---

---

**SOCIAL MEDIA:**

May we contact you by Facebook messenger? We would only use Facebook messenger to set up appointments with you. We would not disclose any private information.  No  Yes → If yes, would you be willing to complete interviews by phone or video through Facebook Messenger?  No  Yes

**\*Note:** Messages would come from our study Facebook community page. We will send you an invitation to like or follow our page, however your Facebook friends may be able to see this activity. If you decide to not like or follow our page, please check your messenger junk folder for messages from our study team. Additionally, we advise you not to disclose any private information in Facebook messages that you send to us.

What is your name on Facebook?

Privacy disclaimer: We will not share your private information, however all communication using Facebook messenger is subject to Facebook's privacy and data policies. Facebook collects content and other information messaged or communicated with others. This can include information in or about the content you provide, such as the location of a photo or the date a file was created. More information can be found at [www.facebook.com/about/privacy/](http://www.facebook.com/about/privacy/)

Instagram:  Snapchat:

Other:

---

---

**WORK INFORMATION:**

Are you employed?  No (skip section)  Yes → If yes, can we contact you at work?  No (skip section)  Yes

Company/agency name:  Supervisor name:

Company/agency address:    
Street or PO Box Office or unit number

City State Zipcode

Company/agency phone:    
Work phone Extension

---

---

**SOCIAL SERVICES INFORMATION:**

Do you have a social worker, case manager, counselor, parole officer, etc that you are comfortable with us contacting if we need to reach you?  No (skip section)  Yes

Name:  Agency name:

Address:    
Street or PO Box Apartment or unit number

City State Zipcode

Phone: ( ) Extension:

Email:

---

---

**WHO WILL ALWAYS KNOW HOW TO REACH YOU (E.G., MOTHER, FATHER, ETC)?**

Full name: \* First name Last name Relationship to you

Address: \* Street or PO Box Apartment or unit number

\* City State Zipcode

Phone: \*( ) Email:

---

---

**Please give me the TWO best people to contact who will always know where to locate you.** *Interviewer note:* try to get at least 2 addresses/phone numbers and encourage them to name people beyond people who are also in the study. Use the space provided at the end to collect additional information if the participant provides.

**PERSON 1**

Full name: First name Last name Relationship to you

Address: Street or PO Box Apartment or unit number

City State Zipcode

Phone: ( ) Email:

**PERSON 2**

Full name: First name Last name Relationship to you

Address: Street or PO Box Apartment or unit number

City

State

Zipcode

Phone: (  ) Email: 

---

---

**What is the best way to reach you (check all that apply)?**

- Text message    Phone call    Email    Facebook

**If you do not want us to leave a voicemail or send a text message, please indicate that here:**

- No text messages    No voicemails

**What are the best days to reach you?** Sun. Mon. Tues. Wed. Thurs. Fri. Sat.

**What are the best times to reach you?** Morning Afternoon Evening

**Do you have a preference for the gender of the staff person who contacts you?**

- No preference    Female    Male

If we have trouble contacting you, may we visit you at the address you provided?  Yes  No

**\*Note:** We will make every attempt to contact you in advance.

If yes, what days are the best days to reach you? Sun. Mon. Tues. Wed. Thurs. Fri. Sat.

What are the best times to reach you? Morning Afternoon Evening

Where do you hang out?

---

---

If one year from now, someone owed you \$1000 and your phone number and address had changed, how would that person find you to give it to you?

---

---

---

---

Additional notes or locator information:

---

---

---

---
